# Supplementary material for: Holocene sea ice and paleoenvironment conditions in the Beaufort Sea (Canadian Arctic) reconstructed with lipid biomarkers
Source: Copernicus journal article supplement (doi:10.5194/egusphere-2025-3953), 2025-08-28
Supplement: Supplementary file 1 [file Research Data_LongCore.xlsx]

## Sheet: Long cores
					Sediment ages (yr BP)		Bulk organic matter		Foraminifera	Concentration (ng/g)					Sterols (μg/g)					Fatty acid hydrogen isotope ratio and proxy			OH-GDGT (ng/g)			brGDGT (ng/g)																isoGDGT (ng/g)						GDGT proxies
Core type	Core	Section	Depth (cm)	Bottom depth in core (cm)	Age median	Error	δ13C (‰)	TOC (%)	NPS (#/cm3)	IP25	HBI-II	HBI-III	HBI-IV	PIP_III_25	brassicasterol	campesterol	campestanol	β-sitosterol	stigmastanol	d2H C16 (‰)	STD d2H C16	Salinity (psu±7)	OH-GDGT-0	OH-GDGT-1	OH-GDGT-2	IIIa	IIIa'	IIIb	IIIb'	IIIc	IIIc'	IIa	IIa'	IIb	IIb'	IIc	IIc'	Ia	Ib	Ic	Sum brGDGT	GDGT-0	GDGT-1	GDGT-2	GDGT-3	Cren	Cren isomer	RI-OH'	SST-1 (°C)
MC	PCB09	3	0-1	0	-72	-72	-25.05	1.42	ND	45.4956										-215	3	30.086	79.6351	5.7525	1.18996	14.6409	18.0239	0.312839	0.619196	0	0.143967	11.9623	8.76623	1.43274	2.62954	0	0.342514	16.2794	2.15967	0.435922	77.749	61.6326	314.041	9.32125	2.35187	379.967	4	0.0939322	2.01821
PC	PCB09	1	0-1	0	-72	3	-24.661	1.3102	27.8431	15.0072	39.3708	0.702111	0.741068	0.705022	0.105933	0.0751954		0.289297	0.0493527	-200.877	3	32.7083	30.4605	2.33435	0.542819	5.15645	8.82386	0.379928	0.502924	0.125674	0	10.0504	9.76017	0.890984	2.10038	0.137725	0.34376	34.392	2.62202	0.628056	75.9143	301.775	14.047	4.39275	1.58957	221.901	3.71287	0.102586	2.23349
PC	PCB09	1	2-3	2	86	329	-24.4309	1.22135	ND
PC	PCB09	1	4-5	4	242	658	-24.3307	1.23591	ND
PC	PCB09	1	6-7	6	437	856	-24.4152	1.20933	ND
PC	PCB09	1	8-9	8	654	919.5	-24.5373	1.20759	ND
PC	PCB09	1	10-11	10	831	1132	-24.7978	1.18613	0.980392	17.8751	51.269	0.687516	0.785576	0.844324	0.0601572	0.0759399	0.0469517	0.292162	0.0498413	-228.762	3	27.4056	17.7972	1.28754	0.315469	5.11123	6.0201	0.1288	0.387292	0	0	2.41644	2.3005	0.281694	0.930269	0.0529474	0.252318	5.11846	5.11846	0.575203	28.6937	114.837	5.70771	1.78871	0.551699	78.8441	1.3539	0.0988894	2.14153
PC	PCB09	1	12-13	12	1029	1182	-24.6198	1.18115	ND
PC	PCB09	1	14-15	14	1213	1340.5	-24.8967	1.16037	ND														7.25238	0.564632	0.15266	2.31655	2.82299	0.0520567	0.0777679	0	0	1.25444	1.2615	0.173931	0.495956	0.0260918	0.124454	3.34195	0.343803	0.0980662	12.3895	17.9761	7.25238	0.564632	0.15266	26.5277	0.334626	0.109158	2.39696
PC	PCB09	1	16-17	16	1418	1405	-24.8186	1.18866	ND
PC	PCB09	1	20-21	20	1814	1514	-25.4171	1.1514	0.594059	9.29149	22.886	0.41916	0.231812	0.822194	0.287486	0	0	0.00341182	0.000344331	-211.764	2	30.638	1.80387	0.627909	0.193354	3.18493	3.70589	0.126673	0.233234	0.050748	0	2.91668	2.88084	0.233234	0.55754	0.0435686	0.130066	10.1975	0.728028	0.187945	25.1768	30.3211	5.96486	0.669805	0.191731	22.0107	0.31629	0.386502	9.29606
PC	PCB09	1	22-23	22	2088	1476	-25.1381	1.21351	ND														20.5191	1.40745	0.373386	4.654	5.71118	0.135153	0.187346	0	0	2.92823	2.59064	0.408334	0.939082	0.058856	0.246137	5.6927	0.677137	0.205571	24.4344	57.366	20.5191	1.40745	0.373386	66.6206	0.568571	0.096602	2.08463
PC	PCB09	1	24-25	24	2353	1563.5	-25.0932	1.11498	ND
PC	PCB09	1	26-27	26	2554	1600	-24.8993	1.20558	ND
PC	PCB09	1	28-29	28	2753	1583.5	-24.8526	1.17524	ND
PC	PCB09	1	30-31	30	2963	1645	-25.4198	1.19069	2.15686	31.7591	97.7673	3.14738	1.62908	0.677933	0.0988029	0.0392915	0.0693669	0.0219479	0.0100294	-230.911	2	26.997	60.4409	3.69631	0	11.7326	13.6296	0.650429	0.625219	0.198795	0.111674	6.98763	1.44912	0.950302	2.96912	0.14268	0.780042	14.0661	1.86442	0.615406	56.7731	454.056	22.5338	7.15047	1.99336	366.074	5.79706	0.0576314	1.11521
PC	PCB09	1	32-33	32	3181	1524.5	-25.2182	1.14869	ND
PC	PCB09	1	40-41	40	4091	1326.5	-25.7184	1.01693	1.96078	29.3645	94.4522	4.91195	2.48934	0.554977	0.0960087	0.0391672	0.0722827	0.0225581	0.0130063	-223.246	2.4154	28.4546	33.5848	2.60271	0.491792	7.9893	8.31875	0.45246	0.301357	0.13632	0.12023	5.76212	4.17513	0.880091	2.17244	0.672239	0	10.0652	1.56534	0.467139	43.0781	234.851	11.589	3.87101	1.33005	208.61	3.66729	0.0977742	2.11379
PC	PCB09	1	50-51	50	5052	968			2.35294	19.1507	68.8736	2.08249	0.942733	0.657339	0.295963	0.252577	0.228359	0.111724	0.0234397	-221.036	3	28.8748	35.0249	2.62799	0.586087	10.7727	11.152	0.492101	0.494774	0.1273	0.142242	7.47253	5.56463	1.1286	2.3336	0.163472	0.420701	11.2824	1.64905	0.446675	53.6429	276.257	13.5101	4.63537	1.52362	222.269	3.90802	0.0993795	2.15372
PC	PCB09	1	60-61	60	5737	547	-25.8102	1.0863	3.6	25.5949	105.851	6.00231	3.72682	0.470766	0.122183	0.0417259	0.0728803	0.0283902	0.0100221	-224.697	3	28.1787	56.78	4.20689	1.03954	23.2216	18.2934	0.766736	0.855006	0.253628	0.190753	21.407	11.2288	3.00373	5.46854	0.489661	1.13975	28.3746	4.79319	1.55218	121.039	362.802	22.4151	8.62565	15.8605	355.067	5.33936	0.101344	2.20258
PC	PCB09	1	70-71	70	6151	651	-26.1286	1.3452	0.588235	12.0525	45.0067	1.88753	0.976903	0.571185	0.0895796	0.0434415	0.0695857	0.0306722	0.0119994	-217.965	1.67451	29.4589	27.4617	1.99571	0.49992	10.6072	9.9036	0.390907	0.405087	0.163797	0.193158	7.42361	5.73204	0.980685	2.52698	0.189711	0.581549	11.1667	1.80983	0.60032	52.6752	219.688	11.6519	4.17927	1.29348	179.978	3.01807	0.0999938	2.169
PC	PCB09	1	80-81	80	6596	696.5	-25.9212	1.16402	1.38067	9.54394	36.9132	1.23437	0.713851	0.617283	0.146179	0.0705646	0.0670737	0.0384457	0.0116045	-224.383	3	28.2384	23.4314	1.72146	0.417467	8.57866	8.17096	0.210995	0.285442	0	0.142242	7.12724	4.64585	0.837215	1.86392	0.14628	0.479281	12.4848	1.67083	0.457154	47.1009	178.703	9.21599	3.09069	1.08509	149.339	2.95533	0.0999748	2.16853
PC	PCB09	1	90-91	90	7024	686	-25.9718	1.14771	7.55467
PC	PCB09	1	100-101	100	7467	613.5	-25.8824	0.872271	7.55467	6.76214	34.517	2.31401	0.84214	0.378727	0.13178	0	0	0.0358712	0	-222.18	3	28.6572	35.2537	2.62251	0.636063	15.9932	13.2692	0.436562	0.53644	0	0.171921	10.6494	7.84743	1.58365	3.29407	0.265354	0.575541	15.0994	2.6639	0.770079	73.1561	293.811	14.0307	2.7541	1.98703	153.193	4.60957	0.101127	2.19719
PC	PCB09	1	101-102	101	7500		-26.2595	1.09517	7.36434	4.97016	29.3513	2.55962	1.43285	0.288285	0.139451	0.0753852	0.0735859	0.039764	0.00938647	-220.023	2.89782	29.0674
PC	PCB09	1	102-103	102	7526	598.5	-26.183	1.11022	ND	7.10443	38.109	1.57905	0.574877	0.484149	0.152193	0	0.121296	0.0695848	0	-228.383	3	27.4777
PC	PCB09	2	10-11	123	8218	547	-25.9353	1.17877	7.82779	7.17896	47.4159	3.40981	2.71005	0.305166	0.537135	0	0	0.213442	0.0616455	-221.132	3.30316	28.8566	23.5276	9.08717	3.41461	22.3303	18.1778	0.727727	1.19943	0.206812	0.37583	20.4509	14.0832	2.81618	5.46743	0.494632	1.06471	44.8977	5.61736	1.40903	139.319	512.459	57.8798	3.97936	1.03214	436.799	6.98216	0.441762	10.6707
PC	PCB09	2	12-13	127	8346	500	-26.0265	1.18112	4.53649	9.05734	48.9486	1.57198	0.861087	0.545851	0.180706	0.0916181	0.155696	0.0589106	0.015921	-229.253	1.603	27.3122	49.6994	3.5808	0.886789	19.4522	16.3479	0.573606	0.980624	0	0	14.272	10.4151	2.1084	4.46451	0.354484	0.94361	20.6838	1.35847	0.935193	92.8899	396.076	19.5077	7.02348	2.4699	317.55	5.37321	0.0988495	2.14054
PC	PCB09	2	30-31	143	8783	382	-26.2919	1.07397	2.39521	2.6405	22.0324	0.737616	0.352118	0.42751	0.110702	0.0389775	0.0702675	0.0303419	0.0085974	-231.32	3	26.9193	17.7699	1.82332	0.482702	13.1897	11.0314	0.452723	0.588694	0	0	9.9796	9.9796	1.53041	2.71091	0.274471	0.379096	13.8705	2.32846	0.62271	66.9382	163.163	8.85549	3.29319	1.20187	139.204	2.33948	0.138909	3.13704
PC	PCB09	2	40-41	153	8971	410.5																	19.4429	6.38669	2.72006	16.4079	11.6605	0.733907	0.839662	0.197397	0.289425	13.7503	8.81906	2.26745	3.98661	0.483922	0.853775	18.7053	3.59955	1.01309	83.6079	333.625	37.6726	5.00897	0.945224	282.704	3.57209	0.414254	9.98641
PC	PCB09	2	45-46	158	9083	418.5																	2.84919	1.2241	0.317015	5.68788	5.47383	0.208079	0.26613	0.0973502	0	3.88756	3.67649	1.22697	1.05353	0.197567	0.232924	5.67545	1.06703	0.252633	29.0034	47.131	10.3026	1.00957	0.26625	32.2426	0.401943	0.423235	10.2098
PC	PCB09	2	48-49	161	9123	414.5																	34.1332	3.59945	0.91996	13.3949	10.3834	0.44722	0.429676	0.153273	0.186448	11.0925	7.14978	1.89542	3.29546	0.336213	0.637656	14.8103	3.01156	0.745793	67.9695	307.214	34.1332	3.59945	0.91996	208.481	2.30995	0.140724	3.1822
PC	PCB09	2	50-51	163	9163	416	-26.3176	1.05832	1.1976	5.4639	32.6526	3.10722	0.896732	0.268375	0.153204	0.056276	0.0819798	0.0477533	0.00855726	-227.114	1.89375	27.719	23.8554	2.13298	0.518119	13.7651	11.5948	0	0	0	0	11.6151	7.80558	0	0	0	0	15.7453	0	0	60.526	196.701	10.7265	4.11721	1.51548	162.352	3.06898	0.119564	2.65581
PC	PCB09	2	55-56	168	9273	425																	9.81468	4.07528	1.66849	13.4277	11.6163	0.455771	0.582374	0.133647	0.221984	1.31286	6.66008	1.87658	2.78431	0.324979	0.56067	17.4246	2.93281	0.817494	61.1321	203.482	21.3832	1.8286	0.445681	164.933	2.58403	0.476414	11.5327
PC	PCB09	2	60-61	173	9348	421																	11.0038	3.60285	1.49456	12.2628	8.89715	0.456632	0.481947	0.119237	0.171038	10.2293	7.72999	1.542	2.82244	0.361221	0.58257	15.359	2.5428	0.702871	64.261	175.241	20.2208	2.09415	0.468971	169.417	2.16807	0.409407	9.86585
PC	PCB09	2	70-71	183	9539	411.5	-26.23	1.03169	0.792079	2.70665	29.4744	1.11683	0.418228	0.335792	0.179618	0.214162	0.079042	0.0540422	0.00776751	-228.319	3	27.4899
PC	PCB09	2	90-91	193	9696	426.5	-26.3608	1.04652	0														7.69757	3.30411	1.20832	9.27557	5.7713	0.290595	0.340686	0.0984461	0.0913895	6.58687	4.03965	1.00158	1.49717	0.196777	0.252651	7.52483	1.42521	0.41079	38.8035	129.693	11.9328	1.29935	0.333861	104.6	1.78533	0.46853	11.3366
PC	PCB09	3	0-1	220	10103	428	-26.3875	1.05933	10.9375	2.45749	23.9093	1.82772	0.996661	0.219044	0.160903	0.0772133	0	0.04586	0.0102224	-240.375	1.04937	25.1974	17.1036	1.70907	0.407385	1.28373	9.65953	0.427837	0.507468	0	0	9.76519	6.43152	1.49753	2.65266	0.268575	0.370951	13.5725	2.27843	0.609331	49.3253	132.685	7.59516	3.12427	1.17334	120.804	2.21257	0.131313	2.94809
PC	PCB09	3	20-21	240	10420	409	-26.3188	1.00847	7.38523	2.66459	29.8463	5.01093	2.79663	0.0998502	0.151296	0.0632096	0.0609807	0.0543512	0.00850763	-233.633	3.83902	26.4793	14.0357	1.45789	0.362249	10.0335	1.85865	0.473197	0.447055	0	0	9.66438	6.06615	1.48783	2.4326	0.257233	0.339407	12.1627	2.12729	0.579499	47.9295	135.491	8.08182	3.36316	1.25197	117.267	2.33022	0.13764	3.10546
PC	PCB09	3	40-41	260	10639	397.5	-26.3245	1.04556	0
PC	PCB09	3	60-61	280	10855	387.5	-26.5024	1.02334	0	0	0	0	0
PC	PCB09	4	0-1	320	11299	357.5	-26.3647	0.943678	25.7426	0.278466	20.1226	1.9309	0.668159	0.0292053	0.121669	0.111622	0.0764151	0.047001	0	-231.339	2	26.9156	17.7967	1.4957	0.40006	16.2818	8.97661	0.70514	0.491476	0	0	25.0271	0	1.89499	2.36038	0.457298	0.232603	31.8892	3.53593	1.22225	93.0748	130.47	7.64528	3.77035	1.7076	113.572	2.28262	0.116583	2.58168
PC	PCB09	4	20-21	341	11698	364	-26.3564	0.854206	25.3465	0.742343	12.8728	0	0		0.132677	0.11781	0.0720803	0.0513546	0.00754402	-231.527	3	26.8798	26.4046	2.02324	0.456471	19.8851	10.1057	0.968976	0.586117	0	0	22.8701	0	2.00772	2.45608	0.491133	0.308107	20.2116	2.95087	1.20899	84.0504	204.041	12.5453	5.61897	2.12186	176.834	3.43824	0.101653	2.21028
MC	PCB11	1	0-1	0	-72	-72	-24.94	1.46	ND
GGC	PCB11	1	0-2	0	-71	3	-25.5477	1.3334	0	53.7216	183.72	7.35461	5.34651	0.568373	0.424912	0.236025	0.176489	0.906345	0.178923	-216.748	1.26141	29.6901	48.6226	3.62469	0.58301	25.229	20.8136	0.703341	2.04674	0.16974	0.570441	16.0838	10.3898	2.81811	6.49587	0.40427	1.23914	18.6064	3.63084	0.862786	110.064	434.959	13.6745	4.65677	2.50749	398.12	3.70871	0.090681	1.93734
GGC	PCB11	1	4-6	4	-16	101	-25.3071	1.32493	ND
GGC	PCB11	1	8-10	8	61	134	-25.7511	1.35168	ND
GGC	PCB11	1	10-12	12	141	158.5	-25.5465	1.34444	ND														71.9662	4.37004	0.795184	17.2613	13.7909	0.588861	1.03928	0.180436	0.0849685	9.07182	6.62811	2.47042	4.2596	0.447693	0.977318	11.313	2.61184	0.693901	71.4194	171.27	4.68464	1.49526	0.891269	210.506	2.35102	0.077276	1.60388
GGC	PCB11	1	14-16	14	186	187	-25.551	1.32973	ND
GGC	PCB11	1	16-18	16	232	206.5	-25.6893	1.29658	ND
GGC	PCB11	1	20-22	20	334	285	-25.8309	1.30552	0.588235	37.8043	119.636	1.76701	1.58455	0.794108	0.219529	0.0654069	0.0725282	0.372552	0.0830328	-225.027	3	28.1158	34.6232	2.47371	0.447623	21.9091	17.1864	0.757605	1.44814	0.159833	0.373822	9.09272	7.27438	2.77446	4.74521	0.453386	1.06712	12.5172	2.95733	0.904501	83.6212	299.38	9.84609	3.54556	1.77448	277.171	3.9995	0.0897323	1.91374
GGC	PCB11	1	24-26	24	451	305.5	-25.6049	1.29493	ND
GGC	PCB11	1	40-42	40	898	265	-25.8861	1.27061	ND	40.3161	135.921	6.05322	4.84066	0.545596	0.240244	0.0773212	0.0685682	0.485281	0.0641547	-229.608	1.75638	27.2448	51.7892	3.99532	0.744656	34.7409	28.874	1.08402	2.16588	0.282849	0.56274	17.6635	13.3371	4.97446	7.8805	0.694774	1.58004	23.0961	5.07034	1.45321	143.46	434.624	14.2326	5.27475	17.5802	402.19	2.73672	0.0970229	2.0951
GGC	PCB11	1	60-62	60	1362	467	-25.8511	1.23948	0.594059	33.153	103.39	4.26742	3.60695		0.220347	0.108683	0.129163	0.5108	0.122385	-227.526	3.24906	27.6406	36.9667	3.23062	0.636134	32.028	25.5473	1.06386	2.09454	0.23161	0.523061	16.1736	12.0963	4.7665	7.69635	0.728352	1.7025	20.9559	4.9228	1.58275	132.113	318.501	11.162	4.15187	2.09977	292.192	3.77445	0.110275	2.42474
GGC	PCB11	1	78-82	78	1795	542.5	-25.9182	1.25924	0.4	29.1636	104.56	5.07439	3.7398	0.50886	0.207897	0.0483732	0.0600949	0.425238	0.121197	-233.524	3	26.5002	25.9746	2.12738	1.47559	18.875	15.5533	0.706749	1.11468	0.134609	0.266501	9.97337	7.45978	2.53571	3.99325	0.417436	0.898345	13.2259	2.91612	0.880674	78.9514	214.896	7.02843	2.72565	1.41998	197.703	2.95917	0.171703	3.95281
GGC	PCB11	2	0-2	93	2176	617				36.2269	120.778	9.1193	6.28014	0.417302	0.198147	0.0919301	0.0898736	0.424944	0.0829439	-226.783	1.67298	27.782	39.996	2.75895	0.496902	32.2666	24.9312	1.25344	2.0392	0.247835	0.438339	15.9284	11.8541	4.05279	6.84494	0.604723	1.26324	19.8477	4.55195	1.26116	127.386	323.076	10.3528	3.77023	2.0663	307.681	2.26504	0.086765	1.83993
GGC	PCB11	2	20-22	113	2662	622	-26.231	1.24969	0	32.7972	109.503	6.13862	5.12587	0.490619	0.199584	0.104277	0.122471	0.385218	0.0983732	-233.154	2.43428	26.5704	28.4804	2.05584	0.198343	26.8641	21.7811	0.846255	1.59044	0.187884	0.383907	13.4528	10.1271	4.32788	5.78955	0.555146	1.282	17.3076	4.08038	0.424289	109	256.825	8.33616	3.16204	1.65292	229.389	3.01859	0.079797	1.66659
GGC	PCB11	2	40-42	133	3140	578	-26.4001	1.27134	1	21.3995	78.107	4.63437	3.39728	0.454277	0.227311	0.114145	0.117414	0.518381	0.125368	-234.587	3	26.2979	18.8716	1.54604	0.314477	25.6556	21.3464	1.00158	1.34844	0.182462	0.309277	16.098	12.353	3.63538	5.17325	0.546694	1.02795	19.5006	4.07114	1.19364	113.443	167.152	5.85736	3.53756	1.32418	170.686	2.05296	0.10491	2.29129
GGC	PCB11	2	60-62	153	3612	506.5	-26.3031	1.26432	1.55642	21.2355	75.6378	5.31935	4.41636	0.418496	0.212585	0.107842	0.116735	0.477898	0.120536	-229.314	4.08387	27.3007	29.119	2.48554	0.453635	30.8494	23.7306	1.0869	1.86213	0.22775	0.443643	18.7248	12.7621	4.90518	6.31851	0.683586	1.31405	22.913	5.21243	1.62359	132.658	259.646	8.81596	3.55478	1.76011	227.955	2.27551	0.105833	2.31425
GGC	PCB11	2	80-82	173	4242	558.5	-26.479	1.2198	0	17.9025	67.1709	2.39511	1.84202	0.574012	0.186867	0.0729791	0.0853474	0.418825	0.0926676	-225.753	3	27.9778	20.2563	1.81628	0.315294	23.6969	19.3563	0.87188	1.27293	0.219957	0.348395	14.108	10.5332	3.96793	5.61939	0.565111	1.04713	17.7706	4.08636	1.18663	104.651	172.624	5.92931	2.5086	1.27199	149.579	2.812	0.109294	2.40036
GGC	PCB11	3	0-2	193	5056	655	-26.4245	1.24565	0	16.4804	67.2116	4.20895	2.56192	0.413792	0.235771	0.118925	0.135597	0.472511	0.11791	-229.031	3	27.3545	21.1987	0.847593	0.368248	26.2394	20.6292	0.990794	1.83109	0.220488	0.415615	14.5039	10.7293	3.79695	6.19595	0.56506	1.05011	17.3476	4.21122	1.15464	109.881	195.17	6.91236	2.83619	1.32742	173.27	2.0561	0.0706724	1.43961
GGC	PCB11	3	20-22	213	5859	414.5	-26.3511	1.25307	0	8.78306	48.3853	5.06375	3.74951	0.238204	0.169547	0.113565	0.0916723	0.721399	0	-224.715	4	28.1753	24.3478	2.62202	0.558116	44.2363	30.2207	1.8337	2.73173	0.35395	0.604375	22.8577	15.5068	5.44913	8.77539	0.864933	1.30982	22.7474	5.84151	1.54968	164.883	243.863	9.34687	3.63532	1.76659	207.071	0.651979	0.135798	3.05966
GGC	PCB11	3	40-42	233	6985	590.5	-26.3986	1.19986	0	5.37325	29.7139	1.44938	0.90304	0.400599	0.18941	0.066412	0.0773476	0.532628	0.0856505	-228.357	3	27.4826	13.8746	1.54295	0.286978	34.9754	25.6429	1.50171	2.34343	0.325324	0.51719	17.7784	12.7037	3.75274	7.1127	0.605237	1.08215	16.5413	4.6779	1.23595	130.796	158.878	6.66221	2.78515	1.38056	157.639	0.483333	0.134796	3.03472
GGC	PCB11	3	60-62	253	7930	411	-26.5339	1.11338	0	2.04579	11.254	0.333415	0.25989	0.525199	0.0801015	0.0373991	0.0345855	0.417022	0	-224.246	3	28.2644	3.58338	0.541153	0.0422345	17.8169	12.1232	0.686135	0.839401	0.136456	0.201419	8.50921	5.27662	1.64027	2.70233	0.258901	0.412745	8.15677	2.06072	0.590178	61.4112	46.1211	2.26641	1.24132	0.589034	42.2584	2.21383	0.150146	3.41656
GGC	PCB11	3	80-82	273	8528	455	-26.4482	0.772111	0	0.866245	12.2855	1.22786	0.774504	0.112832	0.0862684	0.0424521	0.0402432	0.539145	0	-229.217	3	27.319	2.9937	0.483019	0.0405716	19.7412	13.0453	0.680526	0.811804	0.151343	0.190328	9.72871	5.88302	1.79865	2.60668	0.279025	0.364168	9.35557	2.172	0.672276	67.4806	34.0499	2.24774	1.13513	0.62528	32.1597	6.57342	0.160397	3.67156
					c factor	PCB11 GGC	5.54707	7.37717																																									2.44138
					c factor	PCB09 PC	4.79377	8.94295																																									0.743433
[truncated: 3 more columns]
