# Supplementary material for: Holocene sea ice and paleoenvironment conditions in the Beaufort Sea (Canadian Arctic) reconstructed with lipid biomarkers
Source: Copernicus journal article supplement (doi:10.5194/egusphere-2025-3953), 2025-08-28
Supplement: Supplementary file 3 [file ResearchData_SurfaceSediment.xlsx]

## Sheet: Sheet1
Station	Cruise	Latitude	Longitude	d2H C16 (‰)	STD d2H C16
PCB01	AMD2104	71.2329	-125.598	-210.054
PCB02	AMD2104	71.622	-128.106	-210.538	5.24652
PCB03	AMD2104	72.1131	-131.047	-202.671	4.00635
PCB04	AMD2104	71.4511	-131.294	-226.81	3.88885
PCB05	AMD2104	71.2029	-131.352	-228.019	5.04315
PCB06	AMD2104	70.7618	-131.43	-254.936	5.24701
PCB07	AMD2104	70.5248	-131.495	-265.352	4.20839
PCB08	AMD2104	70.5249	-133.613
PCB09	AMD2104	71.1024	-135.144	-215
PCB10	AMD2104	70.9095	-136.282	-242.523	3.90439
PCB11	AMD2104	70.5475	-136.01	-256.732	5.3578
PCB12	AMD2104	70.2799	-135.776	-274.611	6.20105
PCB13	AMD2104	69.9916	-135.446
PCB14	AMD2104	70.24	-137.18
PCB16	AMD2104	70.5046	-138.832	-248.483
PCB17	AMD2104	69.4311	-137.999	-269
PCB17a	AMD2104	69.3878	-137.279
PCB18	AMD2104	69.9984	-138.628	-277.39	4.65246
PCB19	AMD2104	70.1638	-138.908	-266.936	5.29142
PCB20	AMD2104	70.5492	-139.82
PCB21	AMD2104	70.3548	-139.983	-260.631	5.37808
PCB23	AMD2104	69.8103	-140.549
SKQ-MC-1	SKQ2022-15s	70.319	-140.65	-247.359	4.63497
SKQ-MC-2	SKQ2022-15s	70.516	-142.46	-236.603	4.63672
SKQ-MC-3	SKQ2022-15s	70.804	-143.97	-227.584	5.55778
SKQ-MC-4	SKQ2022-15s	70.969	-145.72	-219.36	5.29831
