# Supplementary material for: Holocene sea ice and paleoenvironment conditions in the Beaufort Sea (Canadian Arctic) reconstructed with lipid biomarkers
Source: Copernicus journal article supplement (doi:10.5194/egusphere-2025-3953), 2025-08-28
Supplement: Supplementary file 5 [file Table_S1_radiocarbon_dates_calibrated.xlsx]

## Sheet: Sheet1
							Calibrated			Modelled (median)
Core	labID	Depth(cm)	Age (14C years)	error (years)	dR (years)	error (years)	Median (Cal yrs BP)	Min age (Cal yrs BP)	Max age (Cal yrs BP)	Median (Cal yr BP)	Min age (Cal yrs BP)	Max age (Cal yrs BP)
PCB9	OS110669	56	5300	30	-150	100	5635	5425	5855	5563	5048	5893
PCB9	130597.1.1	101	7537	329	28	85	7795	7330	8295	7467	6782	8009
PCB9	OS110857	141	8340	40	-150	100	8890	8625	9160	8703	8299	9042
PCB9	130595.1.1	183	9177	206	28	85	9725	9330	10150	9499	9071	9880
PCB9	OS110670	239	9830	55	-150	100	10860	10575	11120	10393	9943	10752
PCB9	130596.1.1	300	9650	225	28	85	10355	9845	10890	11073	10704	11433
PCB9	OS110671	307	10200	45	-150	100	11350	11130	11665	11154	10806	11500
PCB9	130592.1.1	320	9877	159	206	67	10410	10080	10800	11299	10948	11663
PCB9	130593.1.1	320	9668	196	-150	100	10345	9885	10830	11299	10948	11663
PCB9	OS134017	361	10800	35	50	100	11965	11670	12320	12026	11732	12319
PCB9	OS110672	372	11050	45	50	100	12335	12015	12580	12252	11993	12478
PCB9	OS131596	386	11100	30	50	100	12405	12095	12615	12486	12251	12684
PCB9	OS123914	395	11300	35	50	100	12610	12410	12765	12633	12432	12876
PCB11	PCB11-BM1-11cm	11	1039	89	330	41	170	10	370	99	-41	273
PCB11	129979.1.1	13	989	67	330	41	125	5	285	141	-10	307
PCB11	129998.1.1	41	1898	78	330	41	955	770	1145	898	629	1159
PCB11	129993.1.1	163	4229	88	330	41	3695	3475	3930	3792	3464	4325
PCB11	129981.1.1	218	6100	79	330	41	5985	5770	6185	6032	5722	6366
PCB11	129997.1.1	246	7813	101	330	41	7760	7575	7950	7681	7303	7958
PCB11	129996.1.1	274	8548	176	330	41	8550	8235	8930	8528	8104	9014
